# Supplementary material for: Robust odor identification in novel olfactory environments in mice
Source: PubMed Central journal article supplement (PMC9925783; doi:10.1038/s41467-023-36346-x), 2023-02-13
Supplement: 41467_2023_36346_MOESM3_ESM.pdf [file 41467_2023_36346_MOESM3_ESM.pdf]

## **Description of Additional Supplementary Files**

**Supplementary Data 1:** Detailed training schedule
